# Supplementary material for: Self-driven near-infrared photodetectors based on Sb 2 Te 3 /n-Si heterostructures with low dark current and fast response
Source: Royal Society of Chemistry journal article supplement (doi:10.1039/d4tc04919e), 2025-01-01
Supplement: d4tc04919e1.pdf [file d4tc04919e1.pdf]

## **Self-Driven Near-Infrared Photodetector Based on Sb<sub>2</sub>Te<sub>3</sub>/n-Si Heterostructure with Low Dark Current and Fast Response**

**Hongxi Zhou<sup>1,2</sup>, Yufeng Li<sup>1</sup>, Yuchao Wei<sup>1</sup>, Laijiang Wei<sup>1</sup>, Ming Yang<sup>3</sup>, Chao Chen<sup>1,2,\*</sup>, Jiayue Han<sup>1,2</sup>, Zhiming Wu<sup>1,2,\*</sup>, Jun Wang<sup>1,2,\*</sup> and Yadong Jiang<sup>1,2</sup>**

*<sup>1</sup>School of Optoelectronic Science and Engineering, University of Electronic Science and Technology of China, No.4, Section 2, Jianshe North Road, Chengdu 610054, P.R. China*

*<sup>2</sup>State Key Laboratory of Electronic Thin films and Integrated Devices, University of Electronic Science and Technology of China, No.4, Section 2, Jianshe North Road, Chengdu 610054, P.R. China*

*<sup>3</sup>School of Aviation Engineering Institute, Civil Aviation Flight University of China, No.46 Section 4, Nanchang Road, Guanghan 618307, P.R. China*

*\*Corresponding author: [wjun@uestc.edu.cn](mailto:wjun@uestc.edu.cn); [chenchao@uestc.edu.cn](mailto:chenchao@uestc.edu.cn);  
[zmwu@uestc.edu.cn](mailto:zmwu@uestc.edu.cn)*

Number of pages: 5

Number of tables: 0

Number of figures: 5

Contents:

S1.  $\text{Sb}_2\text{Te}_3$  thickness versus sputtering powers

S2. Carrier concentration and mobility versus annealing time of  $\text{Sb}_2\text{Te}_3$  films

S3. Schematic diagrams of fabrication process for a  $\text{Sb}_2\text{Te}_3/\text{n-Si}$  heterojunction device.

S4. Detectivity as a function of different thickness of  $\text{Sb}_2\text{Te}_3$  under 980 nm illumination

S5. Dependence of noise power density on frequency with zero bias

## S1. $\text{Sb}_2\text{Te}_3$ thickness versus sputtering powers

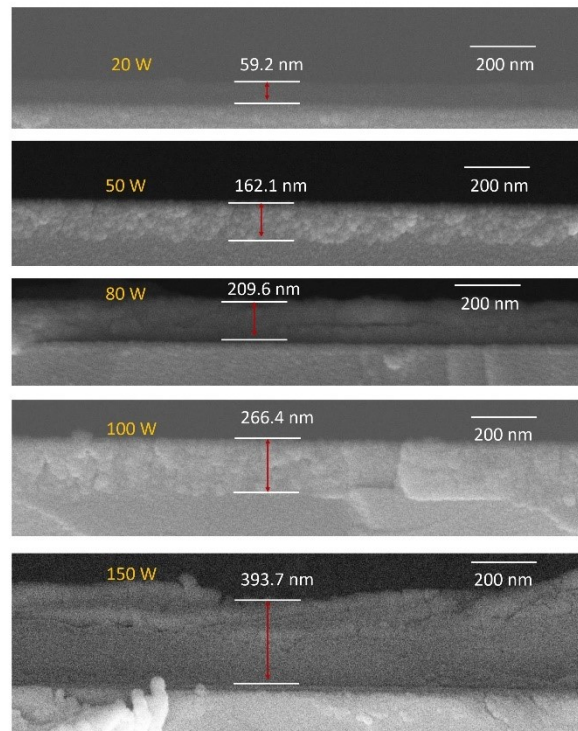

Figure S1  $\text{Sb}_2\text{Te}_3$  thickness versus sputtering powers

## S2. Carrier concentration and mobility versus annealing time of $\text{Sb}_2\text{Te}_3$ films

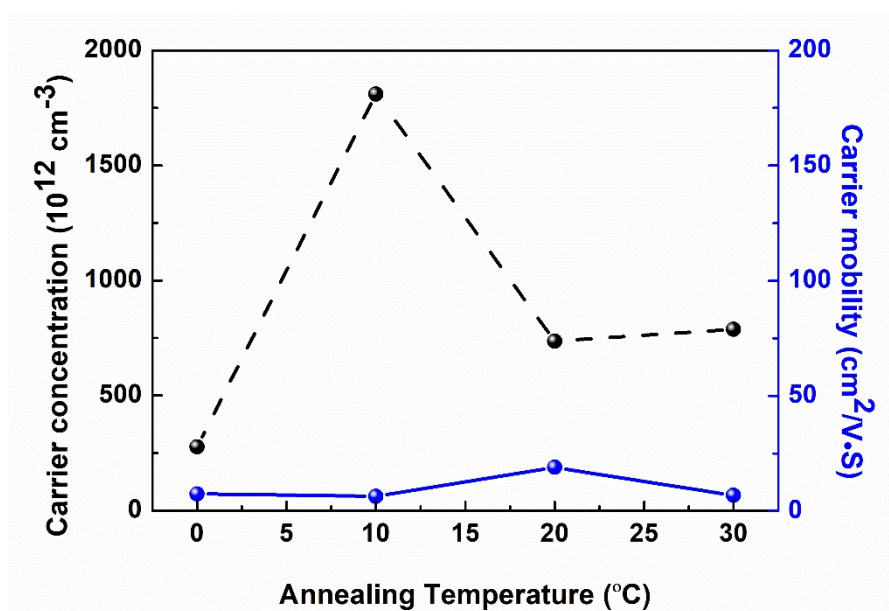

Figure S2 Carrier concentration and mobility versus annealing time of  $\text{Sb}_2\text{Te}_3$  films.

S3. Schematic diagrams of fabrication process for a  $\text{Sb}_2\text{Te}_3/\text{n-Si}$  heterojunction device.

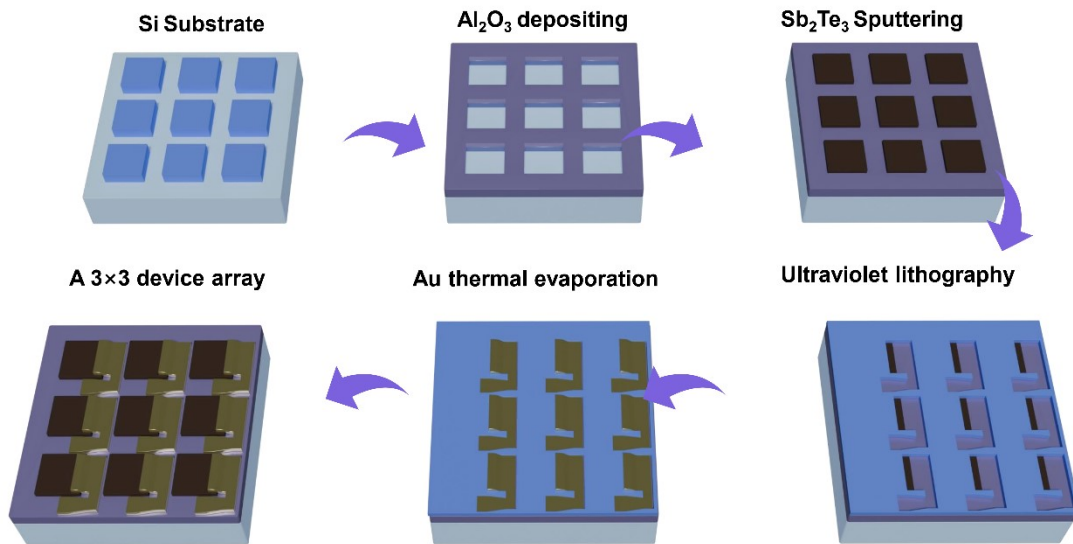

Figure S3 Schematic diagrams of fabrication process for a  $\text{Sb}_2\text{Te}_3/\text{n-Si}$  heterojunction device.

S4. Detectivity as a function of different thickness of  $\text{Sb}_2\text{Te}_3$  under 980 nm illumination

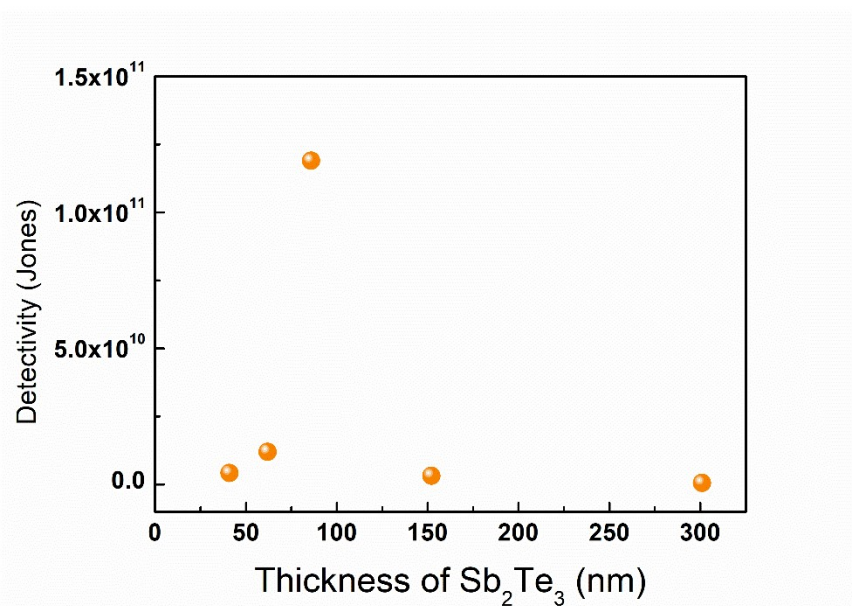

Figure S4 Detectivity as a function of different thickness of  $\text{Sb}_2\text{Te}_3$  under 980 nm illumination. The illumination power density is  $1.4 \text{ mW/cm}^2$ ;  $V_{sd}=0 \text{ V}$ .

S5. Dependence of noise power density on frequency with zero bias

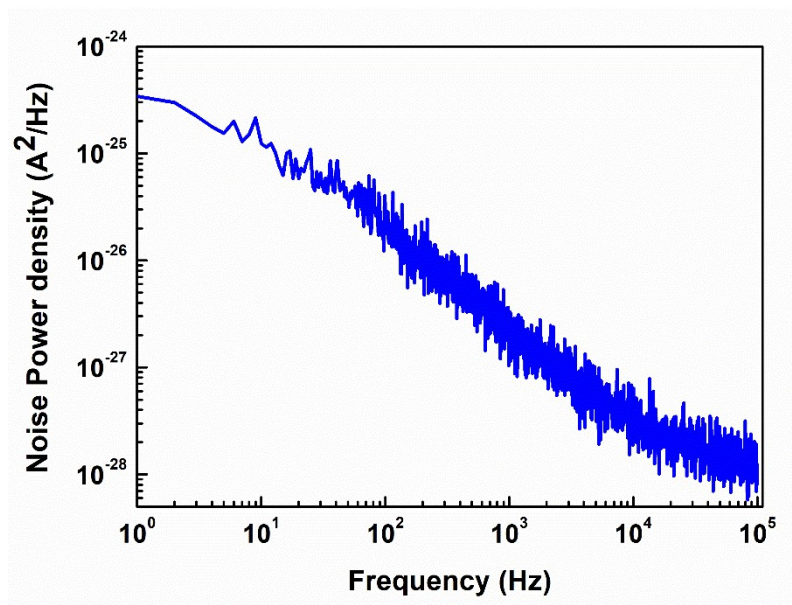

Figure S5 Dependence of noise power density on frequency with zero bias.
